# Supplementary material
Source: Springer Nature journal article supplement (https://www.springermedizin.de/resource/supplementary/12904_2014_212_MOESM2_ESM.pdf/9517776)
Supplement: MOESM2 [file 9517776]

accessible acute alone availability barriers benefits broadband carer challenging city

clinical **communication** competing compromised

computers confer confidence **connections** conscious consent consultation

**conversation** crisis dialled difficulties **discussion** distended educating effective  
efficiency emailed emotionally encouraged environment

**families** financially frightened frustrating hello hopefully

hospitals ideas including **information** instant intensive **interaction** interventions  
invasive kids laughing linked literally looked machines **measuring** meetings members  
methods monitoring networks oncology **options** paediatric perceptions priorities problems

processes Queensland recognising **regional** relationships relying resource

respects **seeing** sensible siblings skills socially streamlining structuring suitable **supports**

symptoms systems talking teams technical teleconferences **telehealth**

**telephone** tired together treating twice unwell valuable **video** worth
